# Supplementary material for: Quantitative validation of nicotine production in tea (Camellia sinensis L.)
Source: PubMed Central journal article supplement (PMC5890992; doi:10.1371/journal.pone.0195422), 2018-04-09

Fresh tea leaves

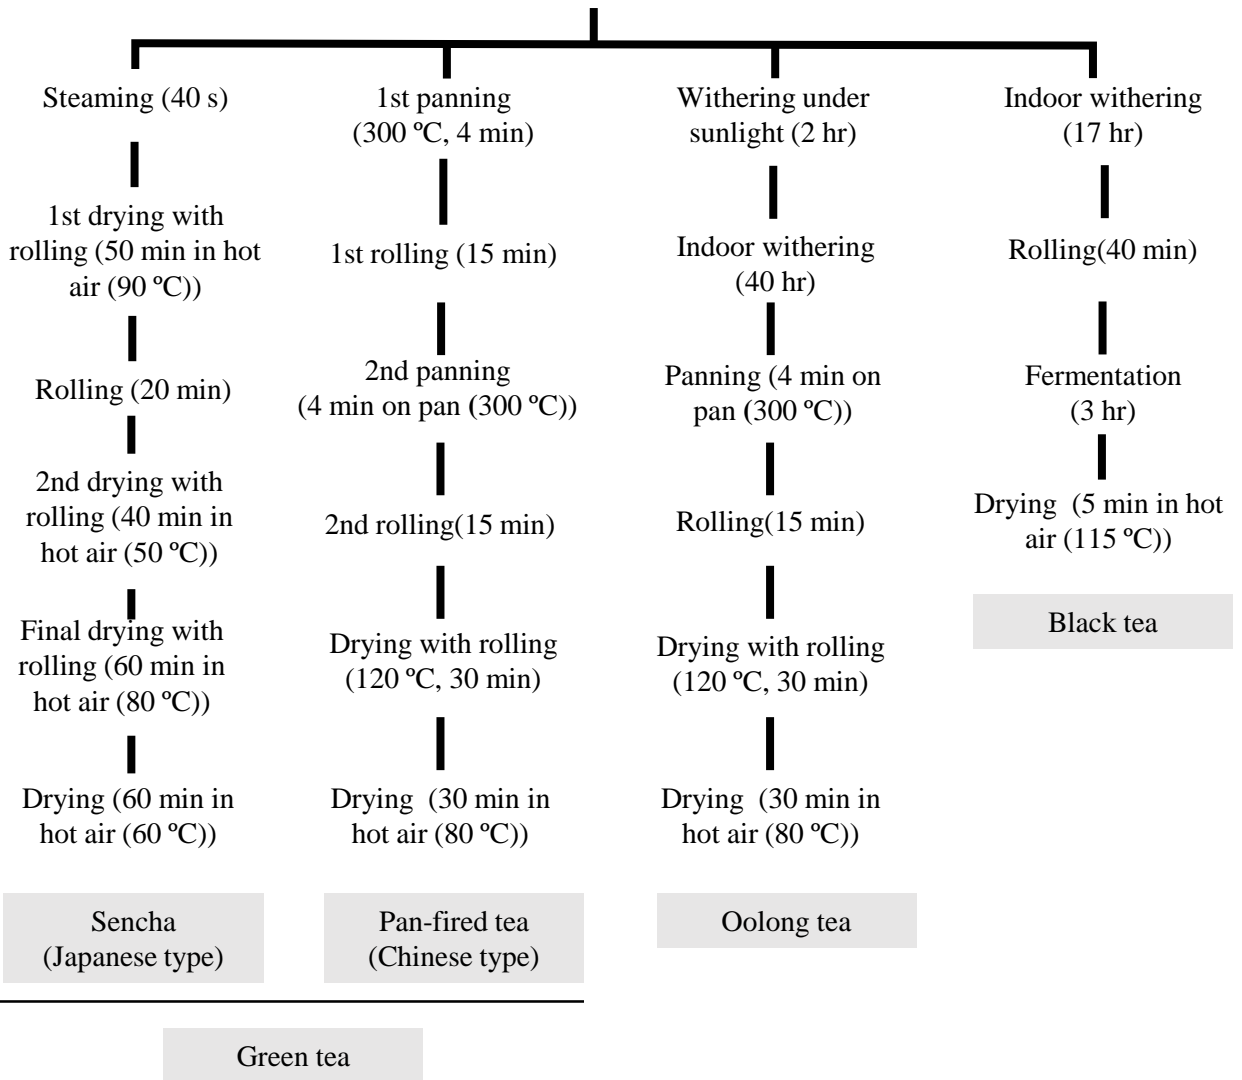

Supplement: pone.0195422.s002.pdf [file pone.0195422.s002.pdf]
